# Supplementary material
Source: publisher figshare collection journal article supplement (https://acs.figshare.com/ndownloader/files/13284092)
Supplement: Supplementary file 1 [file 13284092]

---

## Supporting Information for

### Structure-activity analysis of N-type calcium channel inhibitor SO-3

Minxing Dong,<sup>†,¶</sup> Fei Wang,<sup>†,¶</sup> Zhenzhen Yan,<sup>‡,¶</sup> Shuo Yu,<sup>†, ¶</sup> Juanjuan Wei,<sup>†</sup>  
Qiaoling Wu,<sup>†</sup> Zhuguo Liu,<sup>†</sup> Yifei Tang,<sup>†</sup> Jiuping Ding,<sup>‡</sup> Qiuyun Dai,<sup>†,\*</sup>

<sup>†</sup>Beijing Institute of Biotechnology, Beijing 100071, China

<sup>‡</sup>Key Laboratory of Molecular Biophysics of the Ministry of Education, College of Life  
Science and Technology, Huazhong University of Science and Technology, Wuhan  
430074, China

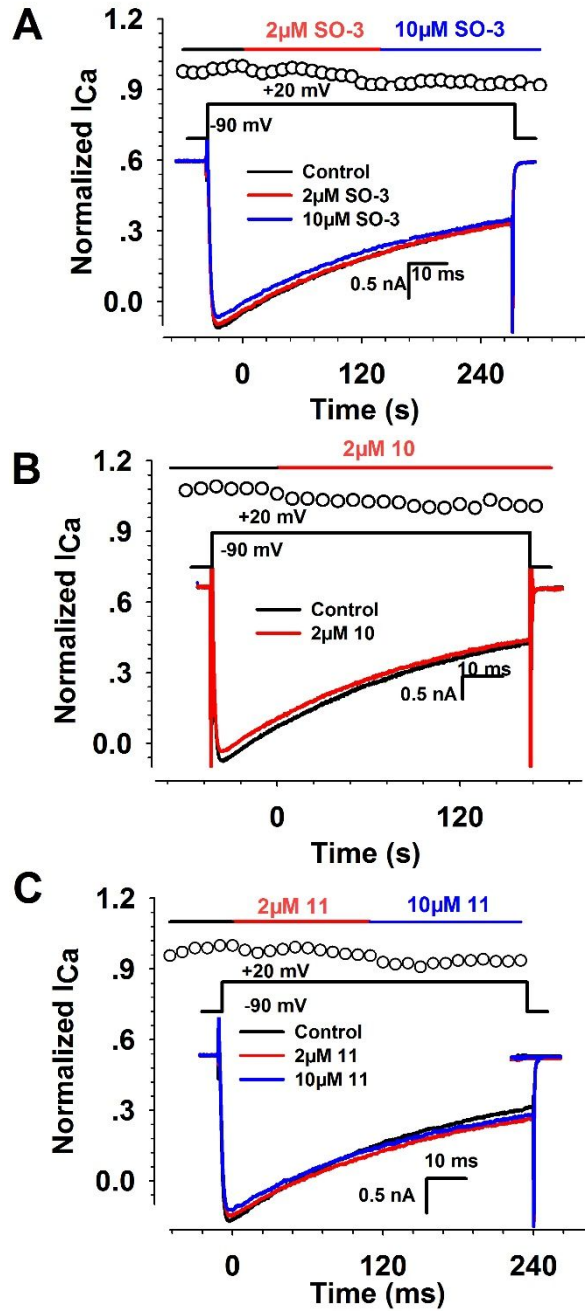

**Figure S1.** SO-3, variant 10 and variant 11 showed no effects on P/Q-type calcium channel (Cav2.1). (A) Top, the blocking time course of Cav2.1 channels treated with 2  $\mu$ M (red) and 10  $\mu$ M (blue) [peptide]; bottom, the repetitive traces of currents, which were evoked by a voltage step from a holding potential of -90 mV to a test pulse of + 20

---

mV for 100 ms with a 15-s interval per sweep. A~C is SO-3, variant **10** and variant **11**, respectively. Data are shown as means  $\pm$  SEM (N=7).
